# Supplementary material for: How Native and Alien Metal Cations Bind ATP: Implications for Lithium as a Therapeutic Agent
Source: PubMed Central journal article supplement (PMC5307966; doi:10.1038/srep42377), 2017-02-14
Supplement: srep42377-s1.pdf [file srep42377-s1.pdf]

# **How Native and Alien Metal Cations Bind ATP: Implications for Lithium as a Therapeutic Agent**

Todor Dudev,<sup>†,\*</sup> Cedric Grauffel,<sup>‡</sup> and Carmay Lim<sup>‡,§,\*</sup>

<sup>†</sup>Faculty of Chemistry and Pharmacy, Sofia University, Sofia 1164, Bulgaria

<sup>‡</sup>Institute of Biomedical Sciences, Academia Sinica, Taipei 11529, Taiwan

<sup>§</sup>Department of Chemistry, National Tsing Hua University, Hsinchu 300, Taiwan

**Table S1a. RMSD of the ATP heavy atoms between different ATP-Mg complexes**

|                                           | <b>Mg(<math>\alpha\beta\gamma</math>)</b> | <b>Mg(<math>\alpha\beta</math>)</b> | <b>Mg(<math>\alpha\gamma</math>)</b> | <b>Mg(<math>\beta\gamma</math>)</b> | <b>Mg(<math>\gamma\gamma</math>)</b> | <b>Mg(<math>\alpha</math>)</b> | <b>Mg(<math>\beta</math>)</b> | <b>Mg(<math>\gamma</math>)</b> |
|-------------------------------------------|-------------------------------------------|-------------------------------------|--------------------------------------|-------------------------------------|--------------------------------------|--------------------------------|-------------------------------|--------------------------------|
| <b>Mg(<math>\alpha\beta\gamma</math>)</b> | 0                                         | 1.6                                 | 0.4                                  | 1.9                                 | 2.0                                  | 1.7                            | 1.1                           | 1.6                            |
| <b>Mg(<math>\alpha\beta</math>)</b>       |                                           | 0                                   | 1.4                                  | 2.4                                 | 1.8                                  | 1.7                            | 1.7                           | 2.1                            |
| <b>Mg(<math>\alpha\gamma</math>)</b>      |                                           |                                     | 0                                    | 2.0                                 | 2.1                                  | 1.6                            | 1.4                           | 1.8                            |
| <b>Mg(<math>\beta\gamma</math>)</b>       |                                           |                                     |                                      | 0                                   | 3.1                                  | <b>3.4</b>                     | 1.7                           | 1.3                            |
| <b>Mg(<math>\gamma\gamma</math>)</b>      |                                           |                                     |                                      |                                     | 0                                    | 1.4                            | 2.3                           | 2.8                            |
| <b>Mg(<math>\alpha</math>)</b>            |                                           |                                     |                                      |                                     |                                      | 0                              | 2.3                           | 2.9                            |
| <b>Mg(<math>\beta</math>)</b>             |                                           |                                     |                                      |                                     |                                      |                                | 0                             | 1.0                            |
| <b>Mg(<math>\gamma</math>)</b>            |                                           |                                     |                                      |                                     |                                      |                                |                               | 0                              |

**Table S1b. RMSD of the ATP heavy atoms between different ATP-Li complexes**

|                                           | <b>Li(<math>\alpha\beta\gamma</math>)</b> | <b>Li(<math>\alpha\beta</math>)</b> | <b>Li(<math>\alpha\gamma</math>)</b> | <b>Li(<math>\beta\gamma</math>)</b> | <b>Li(<math>\gamma\gamma</math>)</b> | <b>Li(<math>\alpha</math>)</b> | <b>Li(<math>\beta</math>)</b> | <b>Li(<math>\gamma</math>)</b> |
|-------------------------------------------|-------------------------------------------|-------------------------------------|--------------------------------------|-------------------------------------|--------------------------------------|--------------------------------|-------------------------------|--------------------------------|
| <b>Li(<math>\alpha\beta\gamma</math>)</b> | 0                                         | 1.5                                 | 0.6                                  | 1.8                                 | 1.9                                  | 1.7                            | 1.4                           | 0.5                            |
| <b>Li(<math>\alpha\beta</math>)</b>       |                                           | 0                                   | 1.6                                  | 0.9                                 | 1.7                                  | 0.8                            | 0.1                           | 1.4                            |
| <b>Li(<math>\alpha\gamma</math>)</b>      |                                           |                                     | 0                                    | 1.8                                 | <b>2.2</b>                           | 1.7                            | 1.6                           | 0.3                            |
| <b>Li(<math>\beta\gamma</math>)</b>       |                                           |                                     |                                      | 0                                   | 1.8                                  | 0.6                            | 0.8                           | 1.6                            |
| <b>Li(<math>\gamma\gamma</math>)</b>      |                                           |                                     |                                      |                                     | 0                                    | 1.7                            | 1.7                           | 2.1                            |
| <b>Li(<math>\alpha</math>)</b>            |                                           |                                     |                                      |                                     |                                      | 0                              | 0.8                           | 1.6                            |
| <b>Li(<math>\beta</math>)</b>             |                                           |                                     |                                      |                                     |                                      |                                | 0                             | 1.4                            |
| <b>Li(<math>\gamma</math>)</b>            |                                           |                                     |                                      |                                     |                                      |                                |                               | 0                              |

**Table S2a. RMSD of the ATP heavy atoms of ATP-Mg( $\alpha\beta\gamma$ )-Li complexes**

|                                                                                                        | <b>Mg(<math>\alpha\beta\gamma</math>)</b> | <b>Mg<br/>(<math>\alpha\beta\gamma</math>) –<br/>Li(<math>\alpha</math>)</b> | <b>Mg<br/>(<math>\alpha\beta\gamma</math>) –<br/>Li(<math>\beta</math>)</b> | <b>Mg<br/>(<math>\alpha\beta\gamma</math>) –<br/>Li(<math>\gamma</math>)</b> | <b>Mg<br/>(<math>\alpha\beta\gamma</math>) –<br/>OH<sup>bridge</sup> –<br/>Li(<math>\alpha</math>)</b> | <b>Mg<br/>(<math>\alpha\beta\gamma</math>) –<br/>OH<sup>bridge</sup> –<br/>Li(<math>\beta</math>)</b> | <b>Mg<br/>(<math>\alpha\beta\gamma</math>) –<br/>OH<sup>bridge</sup> –<br/>Li(<math>\beta\gamma</math>)</b> | <b>Mg<br/>(<math>\alpha\beta\gamma</math>) –<br/>OH<sup>bridge</sup> –<br/>Li(<math>\gamma</math>)</b> |
|--------------------------------------------------------------------------------------------------------|-------------------------------------------|------------------------------------------------------------------------------|-----------------------------------------------------------------------------|------------------------------------------------------------------------------|--------------------------------------------------------------------------------------------------------|-------------------------------------------------------------------------------------------------------|-------------------------------------------------------------------------------------------------------------|--------------------------------------------------------------------------------------------------------|
| <b>Mg(<math>\alpha\beta\gamma</math>)</b>                                                              | 0                                         | 0.2                                                                          | 0.2                                                                         | 0.2                                                                          | 0.3                                                                                                    | 0.3                                                                                                   | 0.2                                                                                                         | 0.5                                                                                                    |
| <b>Mg(<math>\alpha\beta\gamma</math>) –<br/>Li(<math>\alpha</math>)</b>                                |                                           | 0                                                                            | 0.3                                                                         | 0.3                                                                          | 0.4                                                                                                    | 0.4                                                                                                   | 0.3                                                                                                         | 0.6                                                                                                    |
| <b>Mg(<math>\alpha\beta\gamma</math>) –<br/>Li(<math>\beta</math>)</b>                                 |                                           |                                                                              | 0                                                                           | 0.1                                                                          | 0.3                                                                                                    | 0.3                                                                                                   | 0.1                                                                                                         | 0.4                                                                                                    |
| <b>Mg(<math>\alpha\beta\gamma</math>) –<br/>Li(<math>\gamma</math>)</b>                                |                                           |                                                                              |                                                                             | 0                                                                            | 0.3                                                                                                    | 0.3                                                                                                   | 0.2                                                                                                         | 0.4                                                                                                    |
| <b>Mg(<math>\alpha\beta\gamma</math>) –<br/>OH<sup>bridge</sup> –<br/>Li(<math>\alpha</math>)</b>      |                                           |                                                                              |                                                                             |                                                                              | 0                                                                                                      | 0.1                                                                                                   | 0.3                                                                                                         | 0.1                                                                                                    |
| <b>Mg(<math>\alpha\beta\gamma</math>) –<br/>OH<sup>bridge</sup> –<br/>Li(<math>\beta</math>)</b>       |                                           |                                                                              |                                                                             |                                                                              |                                                                                                        | 0                                                                                                     | 0.6                                                                                                         | 0.2                                                                                                    |
| <b>Mg(<math>\alpha\beta\gamma</math>) –<br/>OH<sup>bridge</sup> –<br/>Li(<math>\beta\gamma</math>)</b> |                                           |                                                                              |                                                                             |                                                                              |                                                                                                        |                                                                                                       | 0                                                                                                           | 0.4                                                                                                    |
| <b>Mg(<math>\alpha\beta\gamma</math>) –<br/>OH<sup>bridge</sup> –<br/>Li(<math>\gamma</math>)</b>      |                                           |                                                                              |                                                                             |                                                                              |                                                                                                        |                                                                                                       |                                                                                                             | 0                                                                                                      |

**Table S2b. RMSD of the ATP heavy atoms of ATP-Mg( $\alpha\beta$ )-Li / ATP-Mg( $\beta\gamma$ )-Li complexes relative to the respective ATP-Mg( $\alpha\beta$ )/ ATP-Mg( $\beta\gamma$ ) complex**

|                                                                                          | <b>Mg(<math>\alpha\beta</math>)</b> |                                                                                          | <b>Mg(<math>\beta\gamma</math>)</b> |
|------------------------------------------------------------------------------------------|-------------------------------------|------------------------------------------------------------------------------------------|-------------------------------------|
| <b>Mg(<math>\alpha\beta</math>) – OH<sup>bridge</sup> – Li(<math>\alpha</math>)</b>      | 0.6                                 | <b>Mg(<math>\beta\gamma</math>) – OH<sup>bridge</sup> – Li(<math>\alpha</math>)</b>      | 1.0                                 |
| <b>Mg(<math>\alpha\beta</math>) – OH<sup>bridge</sup> – Li(<math>\beta</math>)</b>       | 0.2                                 | <b>Mg(<math>\beta\gamma</math>) – OH<sup>bridge</sup> – Li(<math>\beta</math>)</b>       | 0.3                                 |
| <b>Mg(<math>\alpha\beta</math>) – OH<sup>bridge</sup> – Li(<math>\gamma</math>)</b>      | 0.3                                 | <b>Mg(<math>\beta\gamma</math>) – OH<sup>bridge</sup> – Li(<math>\gamma</math>)</b>      | 0.2                                 |
| <b>Mg(<math>\alpha\beta</math>) – OH<sup>bridge</sup> – Li(<math>\beta\gamma</math>)</b> | 0.3                                 | <b>Mg(<math>\beta\gamma</math>) – OH<sup>bridge</sup> – Li(<math>\alpha\beta</math>)</b> | 0.2                                 |

**Table S3a. Experimental vs. computed metal-O distance in tetrahydrated Li<sup>+</sup>.**

| Method       |   |                      | Li-O <sub>H</sub> (Å) |
|--------------|---|----------------------|-----------------------|
| X-Ray:       |   |                      | 1.94 ± 0.05           |
| B3LYP        | / | 6-31+G(d,p)          | 1.97                  |
| B3LYP        | / | 6-311++G(d,p)        | 1.97                  |
| B3LYP        | / | 6-311++G(2d,2p)      | 1.98                  |
| SVWN         | / | 6-31+G(d,p)          | NA                    |
| SVWN         | / | 6-311++G(d,p)        | 2.30                  |
| SVWN         | / | 6-311++G(2d,2p)      | 2.60                  |
| M062X        | / | 6-31+G(d,p)          | 1.92                  |
| <b>M062X</b> | / | <b>6-311++G(d,p)</b> | <b>1.96</b>           |
| M062X        | / | 6-311++G(2d,2p)      | 1.97                  |
| M06HF        | / | 6-31+G(d,p)          | 1.91                  |
| M06HF        | / | 6-311++G(d,p)        | 1.92                  |
| M06HF        | / | 6-311++G(2d,2p)      | 1.92                  |
| BMK          | / | 6-31+G(d,p)          | 1.93                  |
| BMK          | / | 6-311++G(d,p)        | 1.94                  |
| BMK          | / | 6-311++G(2d,2p)      | 1.94                  |

**Table S3b. Experimental vs. computed geometries of the CSD entry ‘fecwit’:**

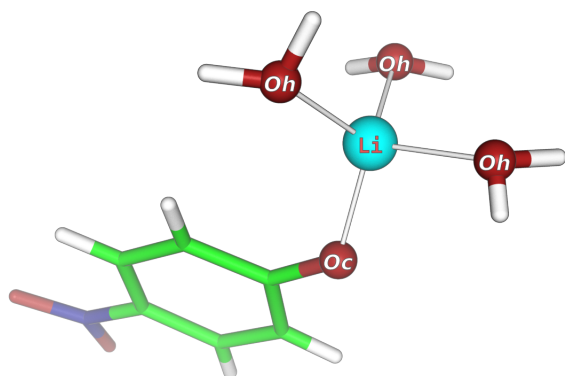

| Method       |                        | Li–O <sub>H</sub> (Å) | Li–O <sub>C</sub> (Å) |
|--------------|------------------------|-----------------------|-----------------------|
| X-Ray:       |                        | 1.97                  | 1.88                  |
| <b>M062X</b> | / <b>6-311++G(d,p)</b> | <b>1.95</b>           | <b>1.85</b>           |
| M062X        | / 6-311++G(2d,2p)      | 1.95                  | 1.83                  |
| M062X        | / 6-31+G(d,p)          | 1.96                  | 1.85                  |
| M062X        | / 6-31+G(2d,2p)        | 1.95                  | 1.83                  |
| B3LYP        | / 6-311++G(d,p)        | 2.00                  | 1.86                  |
| B3LYP        | / 6-311++G(2d,2p)      | 2.01                  | 1.86                  |
| B3LYP        | / 6-31+G(d,p)          | 2.00                  | 1.86                  |
| B3LYP        | / 6-31+G(2d,2p)        | 2.00                  | 1.86                  |
| SVWN         | / 6-311++G(d,p)        | 2.09                  | 1.83                  |
| SVWN         | / 6-311++G(2d,2p)      | 2.44                  | 1.86                  |
| SVWN         | / 6-31+G(d,p)          | 3.09                  | 1.89                  |
| SVWN         | / 6-31+G(2d,2p)        | 3.11                  | 1.88                  |
| BMK          | / 6-311++G(d,p)        | 1.96                  | 1.83                  |
| BMK          | / 6-311++G(2d,2p)      | 1.96                  | 1.86                  |
| BMK          | / 6-31+G(d,p)          | 1.96                  | 1.83                  |
| BMK          | / 6-31+G(2d,2p)        | 1.96                  | 1.82                  |
| M06HF        | / 6-311++G(d,p)        | NA                    | NA                    |
| M06HF        | / 6-311++G(2d,2p)      | 1.95                  | 1.87                  |
| M06HF        | / 6-31+G(d,p)          | 1.95                  | 1.83                  |
| M06HF        | / 6-31+G(2d,2p)        | 1.95                  | 1.83                  |

**Table S3c. Experimental vs. computed geometries of the CSD entry ‘ejezup’:**

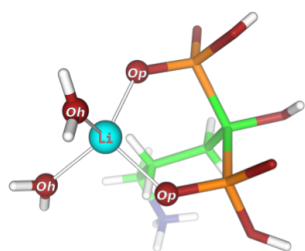

| Method       |   |                      | Li-O <sub>p</sub> (Å) | Li-O <sub>w</sub> (Å) |
|--------------|---|----------------------|-----------------------|-----------------------|
| X-Ray:       |   |                      | 1.90                  | 1.92                  |
| B3LYP        | / | 6-311++G(d,p)        | 1.89                  | 2.01                  |
| B3LYP        | / | 6-31+G(d)            | 1.88                  | 2.02                  |
| B3LYP        | / | 6-31+G(d,p)          | 1.89                  | 2.02                  |
| B3LYP        | / | 6-31+G(2d,2p)        | 1.88                  | 2.02                  |
| B3LYP        | / | 6-31+G(3d,p)         | 1.88                  | 2.02                  |
| B3LYP        | / | 6-311++G(2d,2p)      |                       |                       |
| SVWN         | / | 6-311++G(d,p)        | 1.91                  | 2.60                  |
| SVWN         | / | 6-31+G(d)            | 1.90                  | 2.60                  |
| SVWN         | / | 6-31+G(d,p)          | 1.90                  | 2.56                  |
| SVWN         | / | 6-31+G(2d,2p)        | 1.90                  | 2.59                  |
| SVWN         | / | 6-31+G(3d,p)         | 1.86                  | 2.58                  |
| SVWN         | / | 6-311++G(2d,2p)      | 1.91                  | 2.60                  |
| <b>M062X</b> | / | <b>6-311++G(d,p)</b> | <b>1.87</b>           | <b>1.97</b>           |
| M062X        | / | 6-31+G(d)            | 1.87                  | 2.07                  |
| M062X        | / | 6-31+G(d,p)          | 1.87                  | 2.02                  |
| M062X        | / | 6-31+G(2d,2p)        | 1.93                  | 2.04                  |
| M062X        | / | 6-31+G(3d,p)         | 1.84                  | 1.96                  |
| M062X        | / | 6-311++G(2d,2p)      | 1.90                  | 2.01                  |
| M06HF        | / | 6-311++G(d,p)        | 1.93                  | 1.97                  |
| M06HF        | / | 6-31+G(d)            | 1.93                  | 1.96                  |
| M06HF        | / | 6-31+G(d,p)          | 1.93                  | 1.96                  |
| M06HF        | / | 6-31+G(2d,2p)        | 1.92                  | 1.97                  |
| M06HF        | / | 6-31+G(3d,p)         | 1.90                  | 1.98                  |
| M06HF        | / | 6-311++G(2d,2p)      | 1.92                  | 1.97                  |
| BMK          | / | 6-311++G(d,p)        | 1.89                  | 1.98                  |
| BMK          | / | 6-31+G(d)            | 1.86                  | 1.98                  |
| BMK          | / | 6-31+G(d,p)          | 1.86                  | 1.97                  |
| BMK          | / | 6-31+G(2d,2p)        | 1.85                  | 1.98                  |
| BMK          | / | 6-31+G(3d,p)         | 1.87                  | 1.97                  |
| BMK          | / | 6-311++G(2d,2p)      | 1.89                  | 1.97                  |

**Table S3d. Experimental vs. computed metal–O distance in hexahydrated Mg<sup>2+</sup>:**

| Method       |   |                      | Mg–O (Å)    |
|--------------|---|----------------------|-------------|
| X-Ray:       |   |                      | 2.07 ± 0.03 |
| B3LYP        | / | 6-31+G(d)            | 2.09        |
| B3LYP        | / | 6-31+G(d,p)          | 2.09        |
| B3LYP        | / | 6-31+G(2d,2p)        | 2.08        |
| B3LYP        | / | 6-31+G(3d,p)         | 2.08        |
| B3LYP        | / | 6-31+G(3d,2p)        | 2.07        |
| B3LYP        | / | 6-311++G(d,p)        | 2.08        |
| B3LYP        | / | 6-311++G(2d,2p)      | 2.08        |
| SVWN         | / | 6-31+G(d)            | 2.04        |
| SVWN         | / | 6-31+G(d,p)          | 2.03        |
| SVWN         | / | 6-31+G(2d,2p)        | 2.02        |
| SVWN         | / | 6-31+G(3d,p)         | 2.02        |
| SVWN         | / | 6-31+G(3d,2p)        | 2.02        |
| SVWN         | / | 6-311++G(d,p)        | 2.03        |
| SVWN         | / | 6-311++G(2d,2p)      | 2.02        |
| M062X        | / | 6-31+G(d)            | 2.05        |
| M062X        | / | 6-31+G(d,p)          | 2.04        |
| M062X        | / | 6-31+G(2d,2p)        | 2.03        |
| M062X        | / | 6-31+G(3d,p)         | 2.04        |
| M062X        | / | 6-31+G(3d,2p)        | 2.03        |
| <b>M062X</b> | / | <b>6-311++G(d,p)</b> | <b>2.04</b> |
| M062X        | / | 6-311++G(2d,2p)      | 2.03        |
| M06HF        | / | 6-31+G(d)            | 2.05        |
| M06HF        | / | 6-31+G(d,p)          | 2.05        |
| M06HF        | / | 6-31+G(2d,2p)        | 2.04        |
| M06HF        | / | 6-31+G(3d,p)         | 2.04        |
| M06HF        | / | 6-31+G(3d,2p)        | 2.04        |
| M06HF        | / | 6-311++G(d,p)        | 2.05        |
| M06HF        | / | 6-311++G(2d,2p)      | 2.04        |
| BMK          | / | 6-31+G(d)            | 2.06        |
| BMK          | / | 6-31+G(d,p)          | 2.06        |
| BMK          | / | 6-31+G(2d,2p)        | 2.05        |
| BMK          | / | 6-31+G(3d,p)         | 2.04        |
| BMK          | / | 6-31+G(3d,2p)        | NA          |
| BMK          | / | 6-311++G(d,p)        | 2.05        |
| BMK          | / | 6-311++G(2d,2p)      | 2.05        |

Table S3e. Experimental vs. computed geometries of the CSD entry ‘geqbio’:

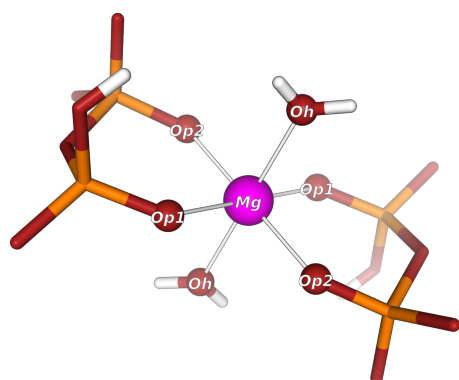

| Method       |          |                      | Mg–O <sub>H</sub><br>(Å) | Mg–O <sub>P1</sub><br>(Å) | Mg–O <sub>P2</sub><br>(Å) | Mg–O <sub>P1</sub> –P<br>(°) | Mg–O <sub>P2</sub> –P<br>(°) |
|--------------|----------|----------------------|--------------------------|---------------------------|---------------------------|------------------------------|------------------------------|
| X-Ray:       |          |                      | 2.13                     | 2.09                      | 2.05                      | 133.5                        | 133.5                        |
| B3LYP        | /        | 6-31+G(d)            | 2.21                     | 2.08                      | 2.08                      | 125.8                        | 133.8                        |
| B3LYP        | /        | 6-31+G(d,p)          | 2.22                     | 2.08                      | 2.08                      | 125.8                        | 133.4                        |
| B3LYP        | /        | 6-31+G(2d,2p)        | 2.22                     | 2.07                      | 2.07                      | 126.0                        | 133.3                        |
| B3LYP        | /        | 6-31+G(3d,p)         | 2.22                     | 2.07                      | 2.07                      | 126.4                        | 133.3                        |
| B3LYP        | /        | 6-31+G(3d,2p)        | 2.23                     | 2.06                      | 2.07                      | 126.4                        | 133.2                        |
| B3LYP        | /        | 6-311++G(d,p)        | 2.22                     | 2.08                      | 2.08                      | 127.3                        | 134.2                        |
| B3LYP        | /        | 6-311++G(2d,2p)      | 2.22                     | 2.07                      | 2.07                      | 126.2                        | 133.2                        |
| SVWN         | /        | 6-31+G(d)            | 2.11                     | 2.06                      | 2.04                      | 135.1                        | 122.0                        |
| SVWN         | /        | 6-31+G(d,p)          | 2.11                     | 2.06                      | 2.04                      | 134.9                        | 121.8                        |
| SVWN         | /        | 6-31+G(2d,2p)        | 2.12                     | 2.05                      | 2.03                      | 132.2                        | 124.0                        |
| SVWN         | /        | 6-31+G(3d,p)         | 2.11                     | 2.05                      | 2.02                      | 133.6                        | 123.3                        |
| SVWN         | /        | 6-31+G(3d,2p)        | 2.12                     | 2.05                      | 2.02                      | 132.7                        | 123.8                        |
| SVWN         | /        | 6-311++G(d,p)        | 2.12                     | 2.06                      | 2.04                      | 135.5                        | 122.9                        |
| SVWN         | /        | 6-311++G(2d,2p)      | 2.12                     | 2.04                      | 2.06                      | 122.2                        | 130.8                        |
| M062X        | /        | 6-31+G(d)            | 2.14                     | 2.07                      | 2.04                      | 135.6                        | 123.4                        |
| M062X        | /        | 6-31+G(d,p)          | 2.14                     | 2.08                      | 2.04                      | 135.6                        | 123.0                        |
| M062X        | /        | 6-31+G(2d,2p)        | 2.14                     | 2.06                      | 2.03                      | 134.8                        | 123.6                        |
| M062X        | /        | 6-31+G(3d,p)         | 2.14                     | 2.06                      | 2.03                      | 134.7                        | 123.7                        |
| M062X        | /        | 6-31+G(3d,2p)        | 2.15                     | 2.05                      | 2.03                      | 134.7                        | 123.8                        |
| <b>M062X</b> | <b>/</b> | <b>6-311++G(d,p)</b> | <b>2.15</b>              | <b>2.07</b>               | <b>2.04</b>               | <b>136.5</b>                 | <b>124.4</b>                 |
| M062X        | /        | 6-311++G(2d,2p)      | 2.14                     | 2.06                      | 2.03                      | 135.2                        | 123.6                        |
| M06HF        | /        | 6-31+G(d)            | 2.15                     | 2.07                      | 2.07                      | 124.3                        | 132.8                        |
| M06HF        | /        | 6-31+G(d,p)          | 2.15                     | 2.07                      | 2.07                      | 124.1                        | 132.7                        |
| M06HF        | /        | 6-31+G(2d,2p)        | 2.15                     | 2.06                      | 2.05                      | 124.2                        | 131.8                        |
| M06HF        | /        | 6-31+G(3d,p)         | 2.15                     | 2.06                      | 2.05                      | 124.5                        | 132.1                        |
| M06HF        | /        | 6-31+G(3d,2p)        | 2.15                     | 2.06                      | 2.05                      | 124.3                        | 132.0                        |
| M06HF        | /        | 6-311++G(d,p)        | 2.15                     | 2.06                      | 2.06                      | 125.6                        | 133.5                        |
| M06HF        | /        | 6-311++G(2d,2p)      | 2.15                     | 2.06                      | 2.05                      | 124.8                        | 132.3                        |
| BMK          | /        | 6-31+G(d)            | 2.16                     | 2.09                      | 2.05                      | 135.9                        | 124.3                        |
| BMK          | /        | 6-31+G(d,p)          | 2.18                     | 2.06                      | 2.06                      | 128.1                        | 129.7                        |



|     |   |                 |      |      |      |       |       |
|-----|---|-----------------|------|------|------|-------|-------|
| BMK | / | 6-31+G(2d,2p)   | NA   | NA   | NA   | NA    | NA    |
| BMK | / | 6-31+G(3d,p)    | 2.18 | 2.04 | 2.04 | 129   | 130.5 |
| BMK | / | 6-31+G(3d,2p)   | NA   | NA   | NA   | NA    | NA    |
| BMK | / | 6-311++G(d,p)   | 2.17 | 2.08 | 2.04 | 136.7 | 125.6 |
| BMK | / | 6-311++G(2d,2p) | 2.18 | 2.05 | 2.05 | 128.5 | 130.1 |

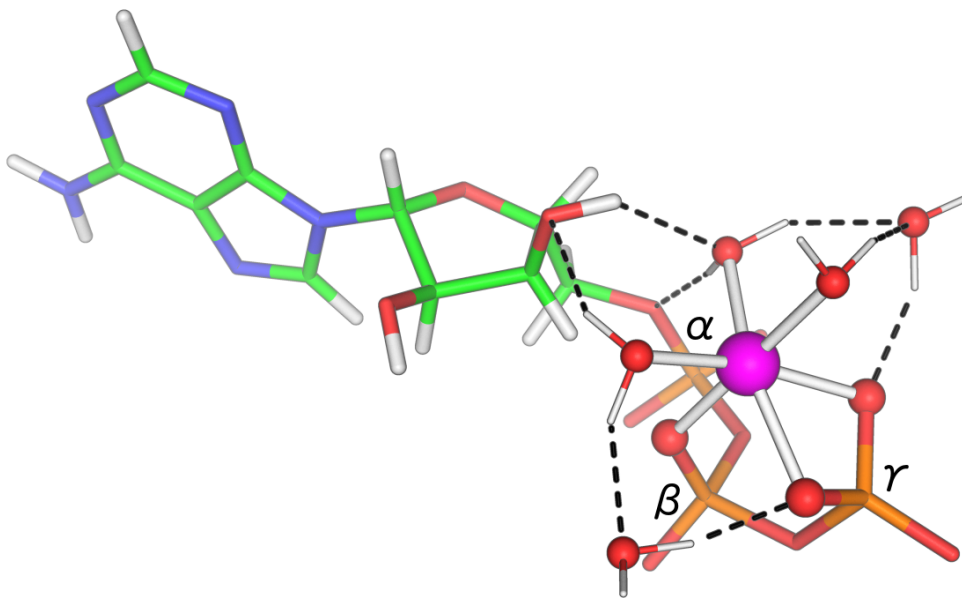

**ATP-Mg( $\beta\gamma\gamma$ )**  
 **$\Delta\Delta G = +11.0$  kcal/mol**

**Figure S1.** M062X/6-311++G(d,p)-optimized structure of ATP-Mg( $\beta\gamma\gamma$ ).

**A**

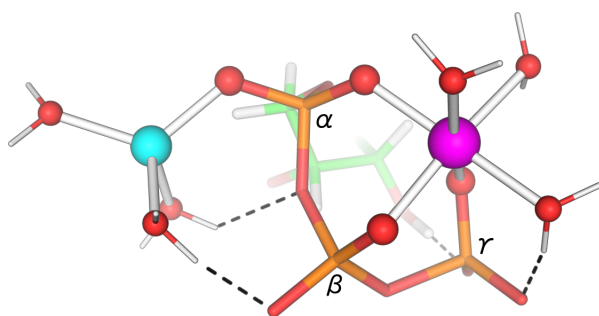

ATP-Mg( $\alpha\beta\gamma$ )-Li( $\alpha$ )  
 $\Delta\Delta G = +26.1$  kcal/mol

**B**

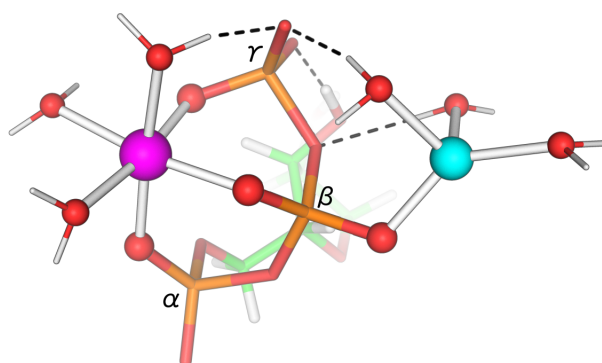

ATP-Mg( $\alpha\beta\gamma$ )-Li( $\beta$ )  
 $\Delta\Delta G = +25.6$  kcal/mol

**C**

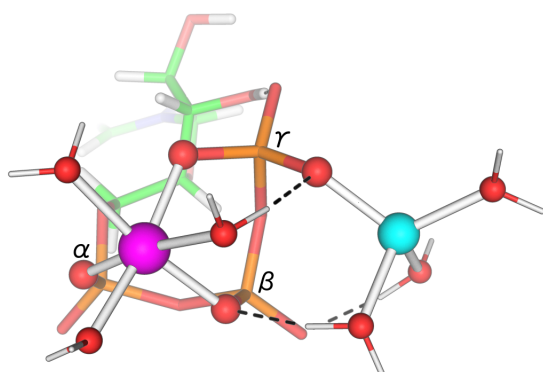

ATP-Mg( $\alpha\beta\gamma$ )-Li( $\gamma$ )  
 $\Delta\Delta G = +23.5$  kcal/mol

**Figure S2.** M062X/6-311++G(d,p)-optimized structures of  $\text{Li}^+$  monodentately bound to ATP-Mg- $\alpha\beta\gamma$

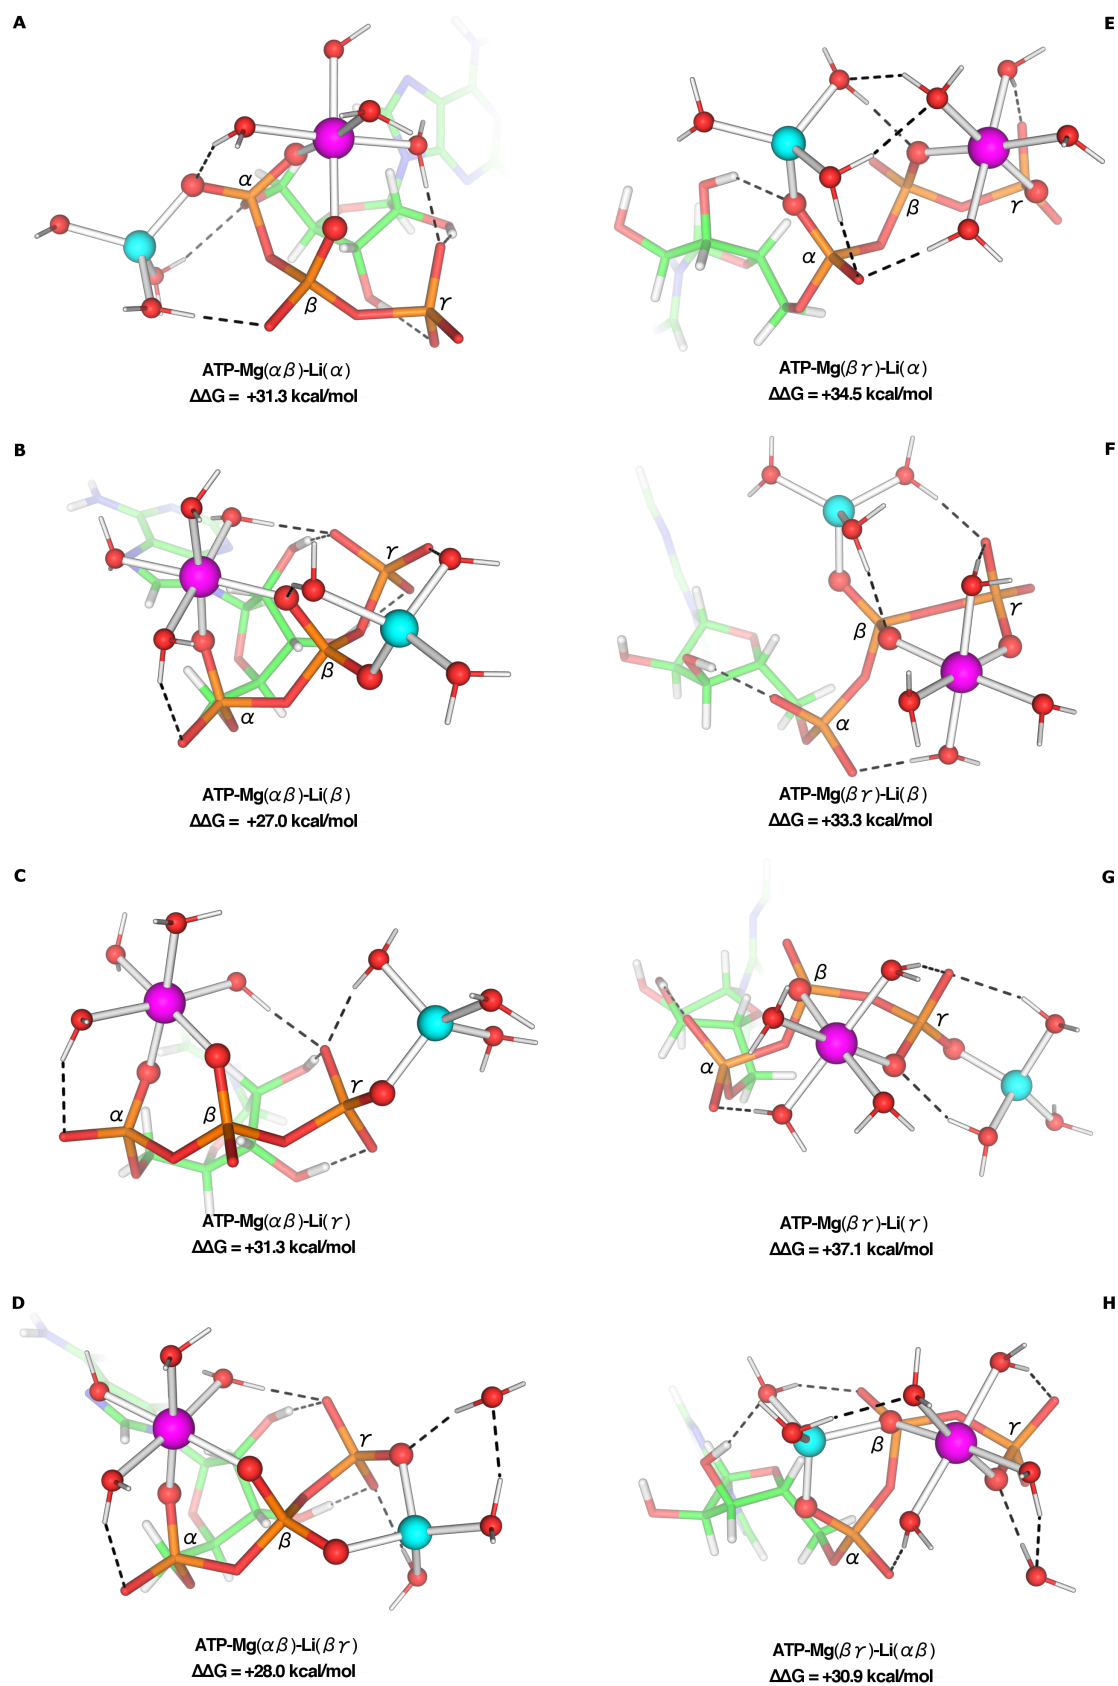

**Figure S3.** M062X/6-311++G(d,p)-optimized structures of ATP-Mg- $\alpha\beta$ -Li or ATP-Mg- $\beta\gamma$ -Li mononuclear complexes

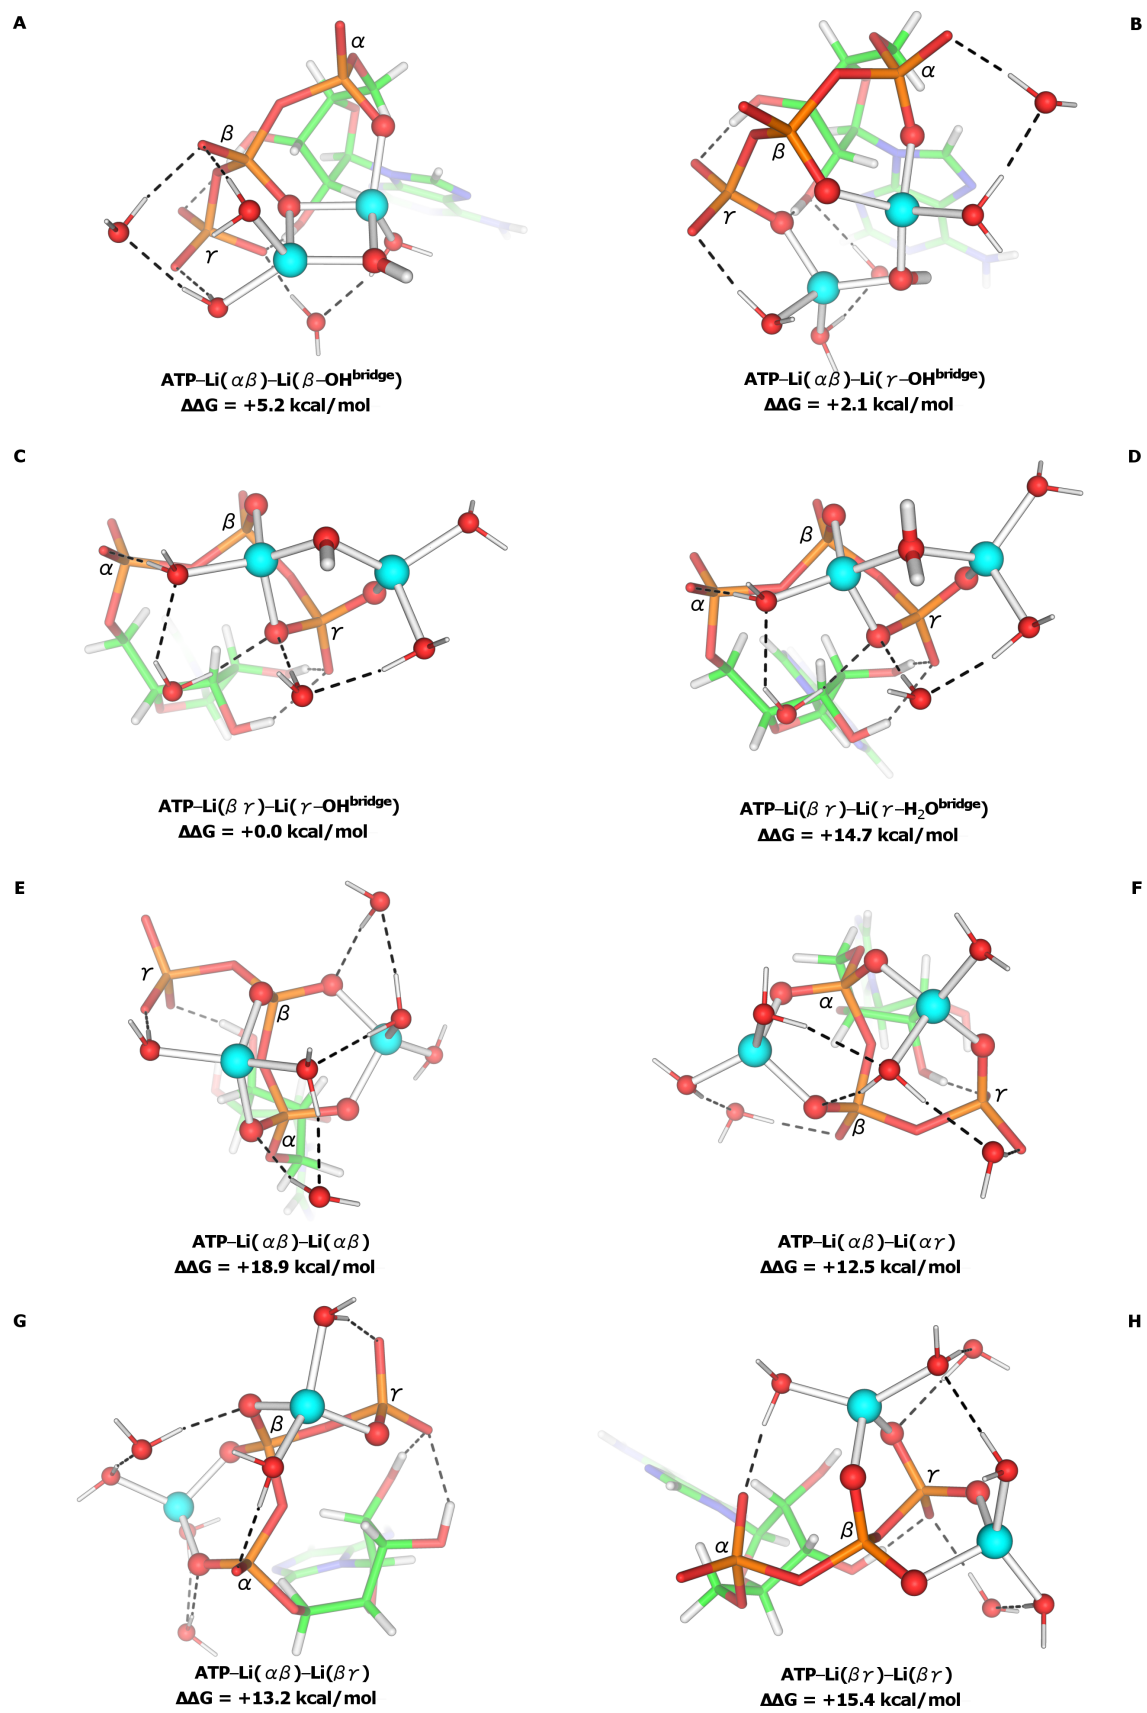

**Figure S4.** M062X/6-311++G(d,p)-optimized structures of  $[\text{Li}_2(\text{H}_2\text{O})_6\text{ATP}]^{2-}$ .
